# Supplementary material for: Interaction between Wnt/β-catenin signaling pathway and EMT pathway mediates the mechanism of sunitinib resistance in renal cell carcinoma
Source: Springer Nature journal article supplement (doi:10.1186/s12885-024-11907-5), 2024-02-05

Fig5 A

1.  $\beta$ -actin: 42KDa

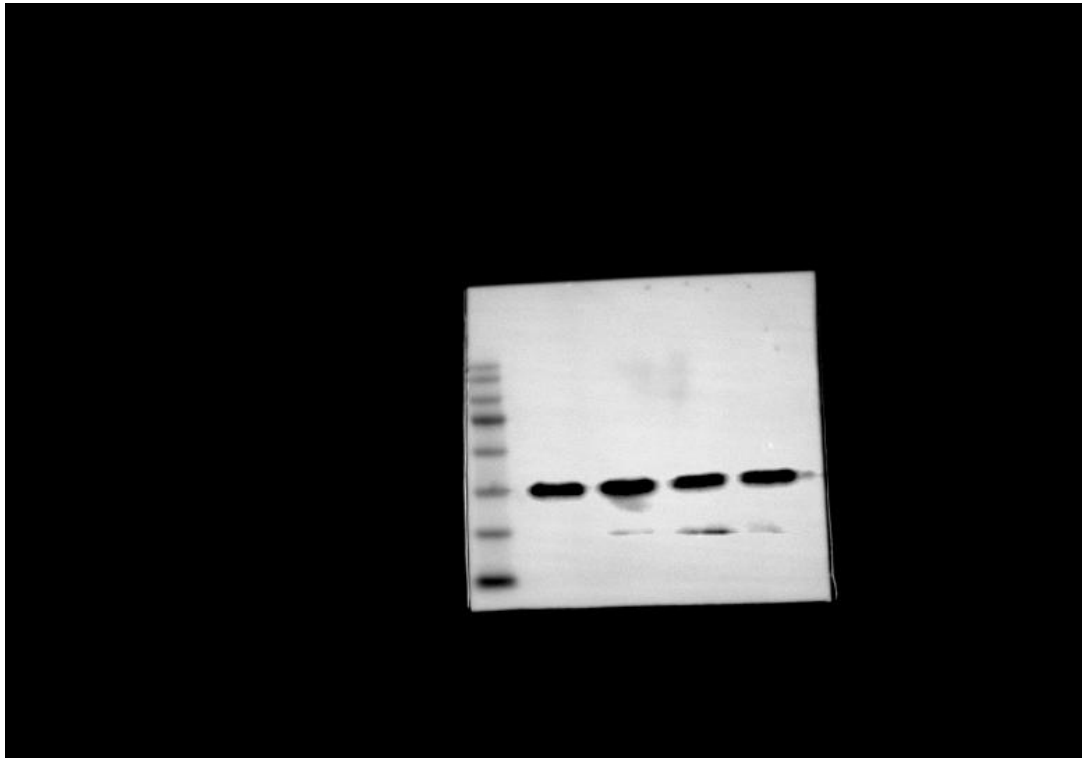

2. GSK3 $\beta$ : 46 kDa

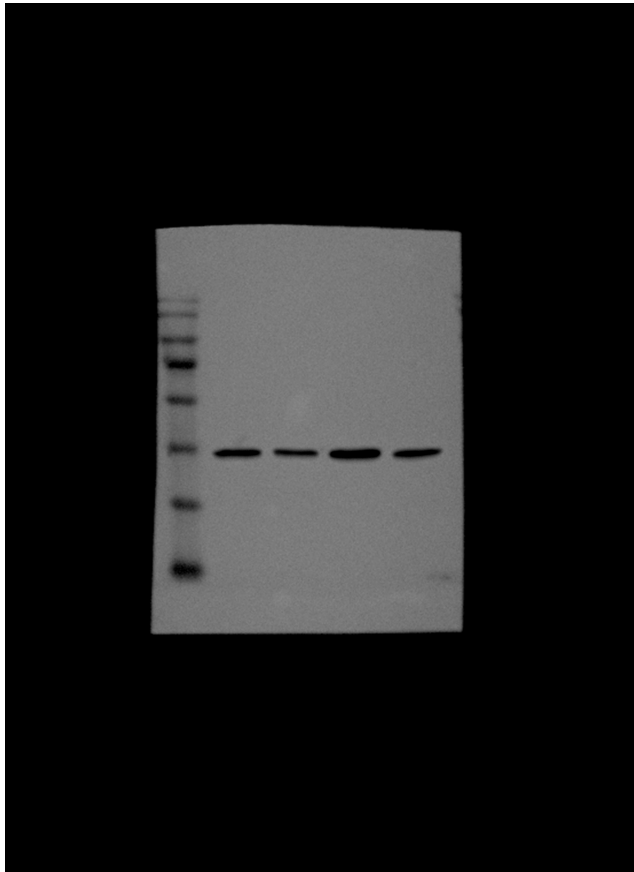

3.  $\beta$ -Catenin: 85 kDa

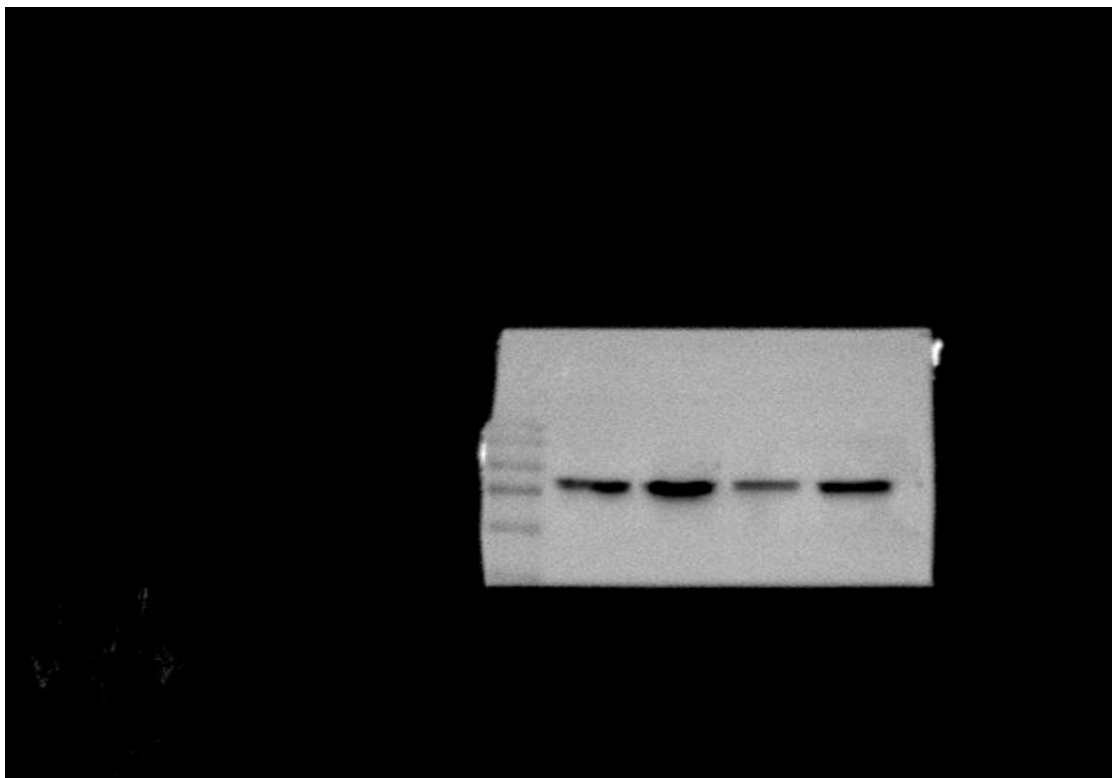

4. TCF4: 90 kDa

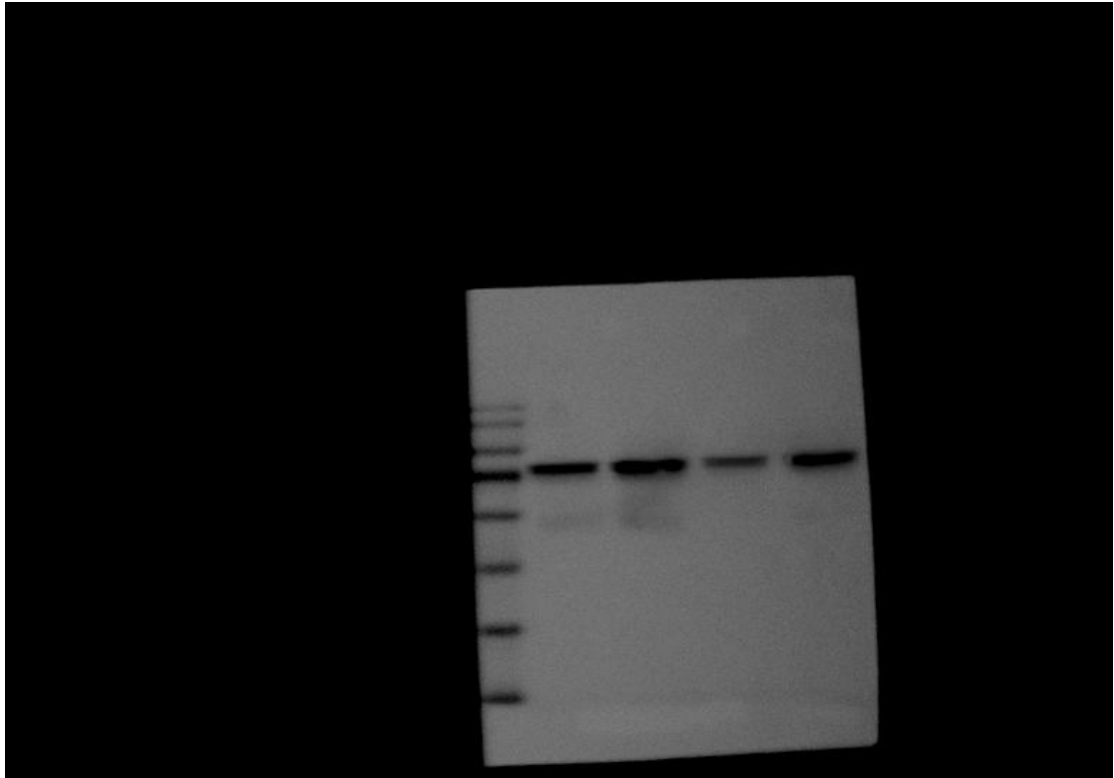

5. Snail: 29 kDa

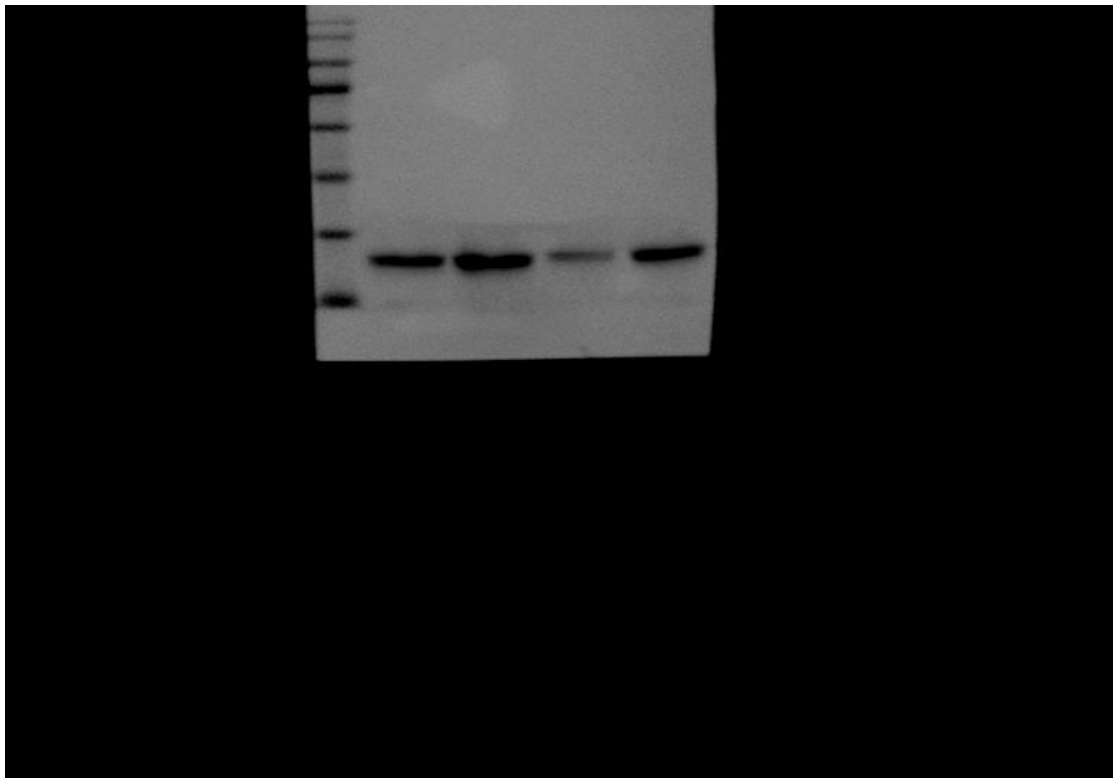

6. E-caderin: 100Kda

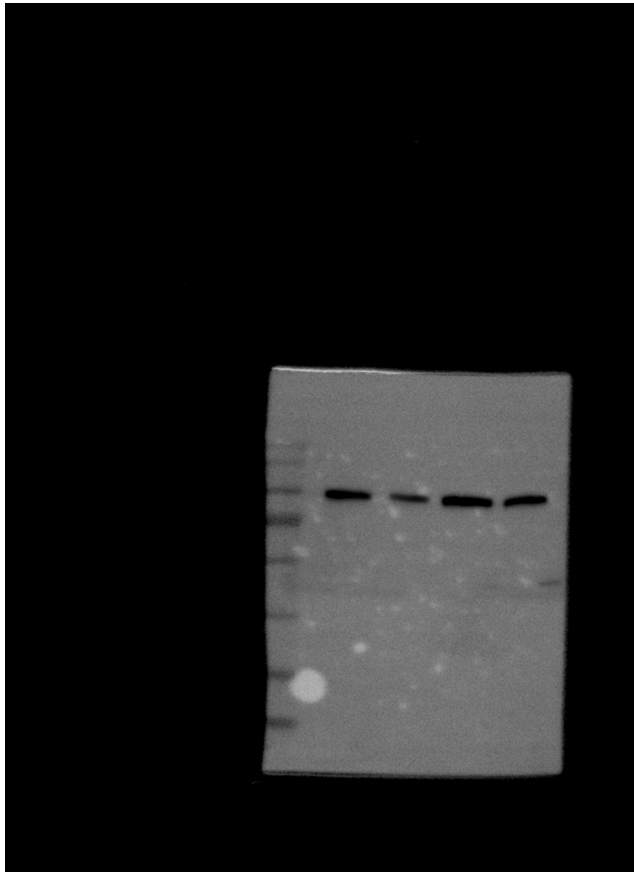

7. Twist: 21 kDa

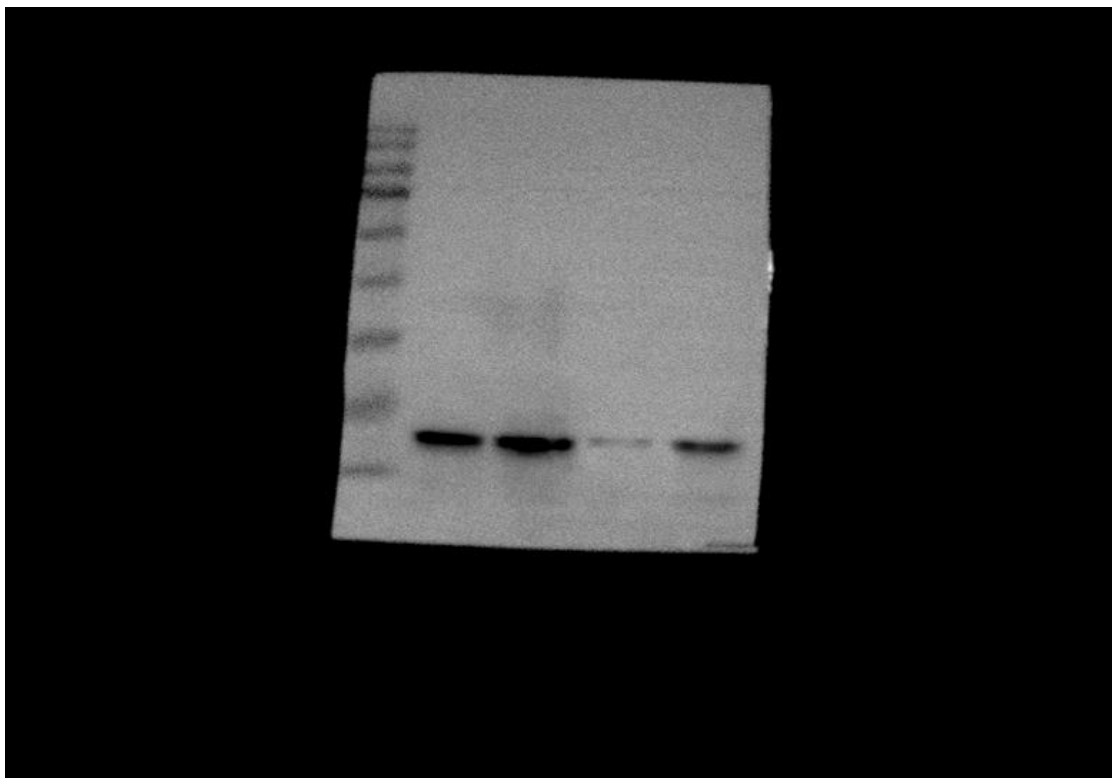

Fig6 A

1.  $\beta$ -actin: 42KDa

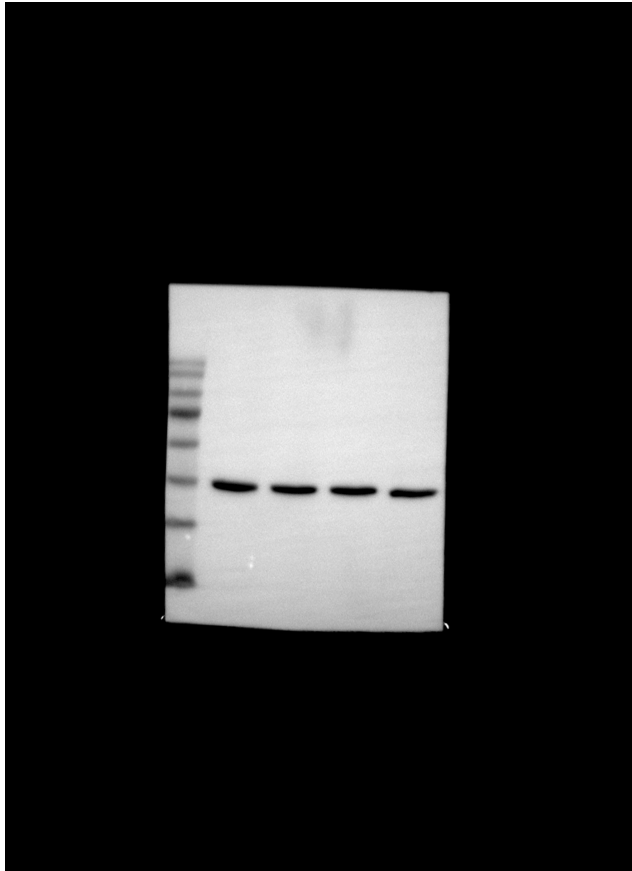

2. GSK3 $\beta$ : 46 kDa

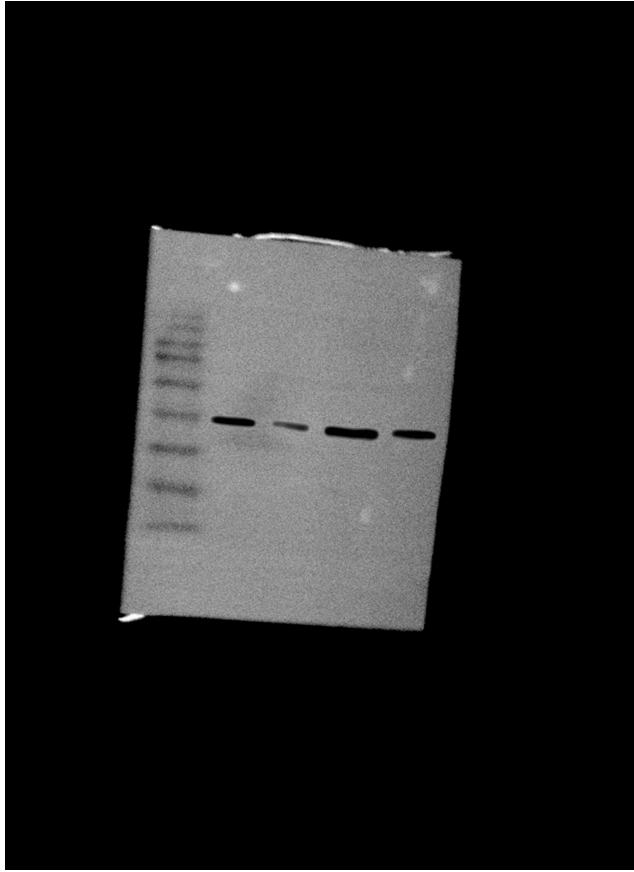

3.  $\beta$ -Catenin: 85 kDa

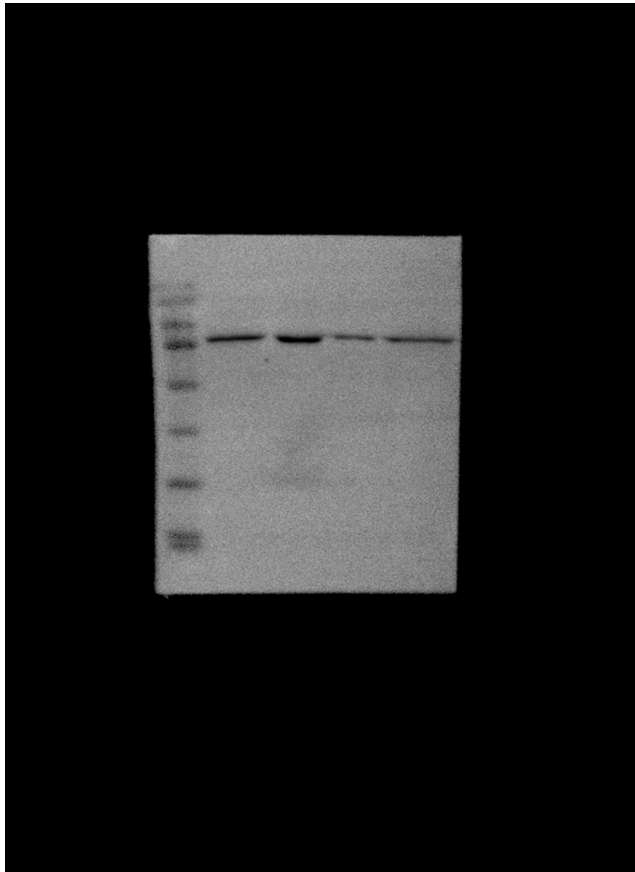

4. TCF4: 90 kDa

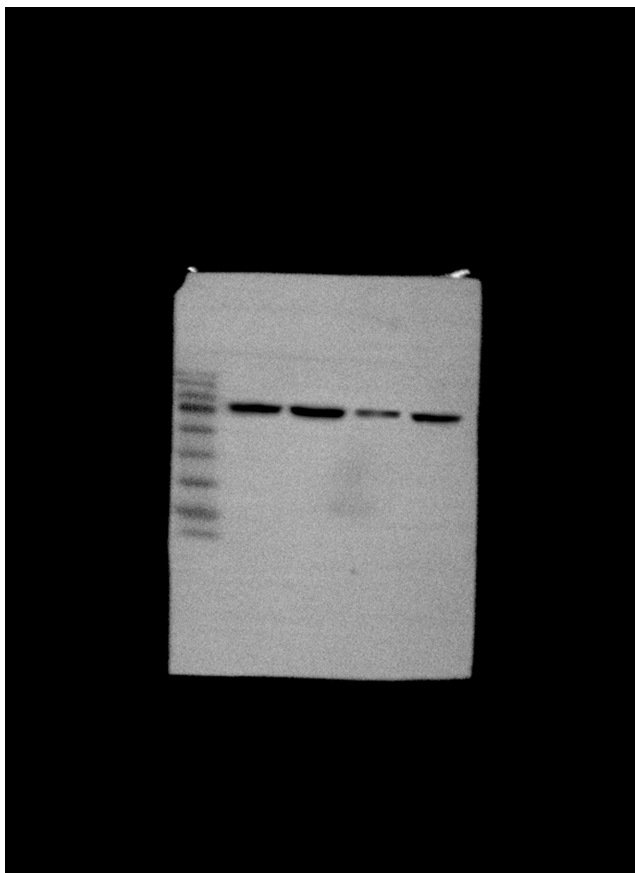

5. Snail: 29 kDa

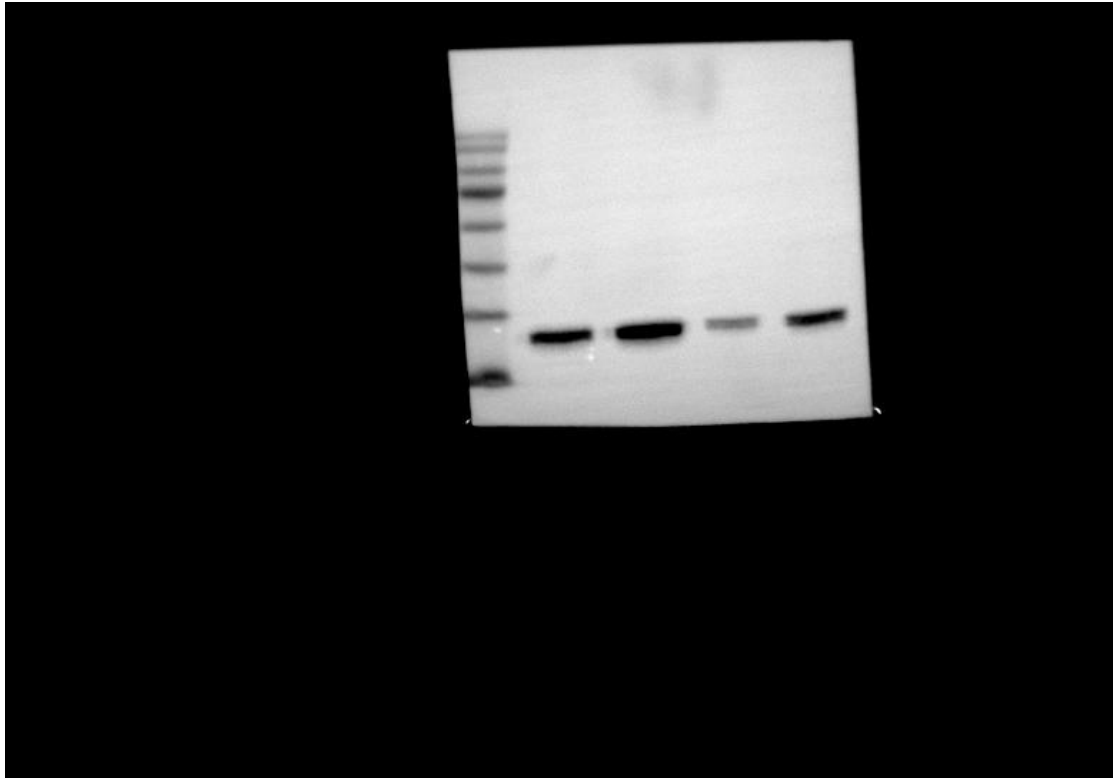

6. E-caderin: 100Kda

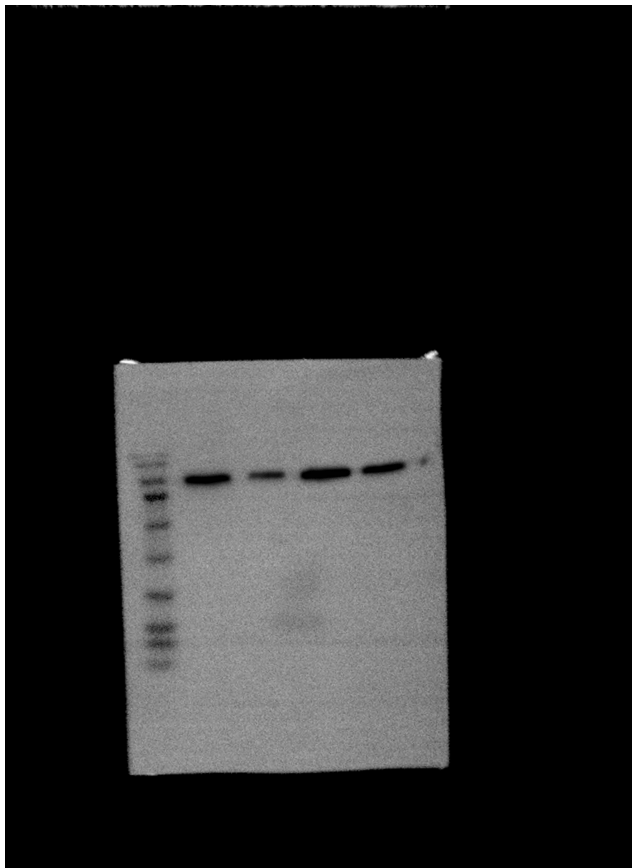



7. Twist: 21 kDa

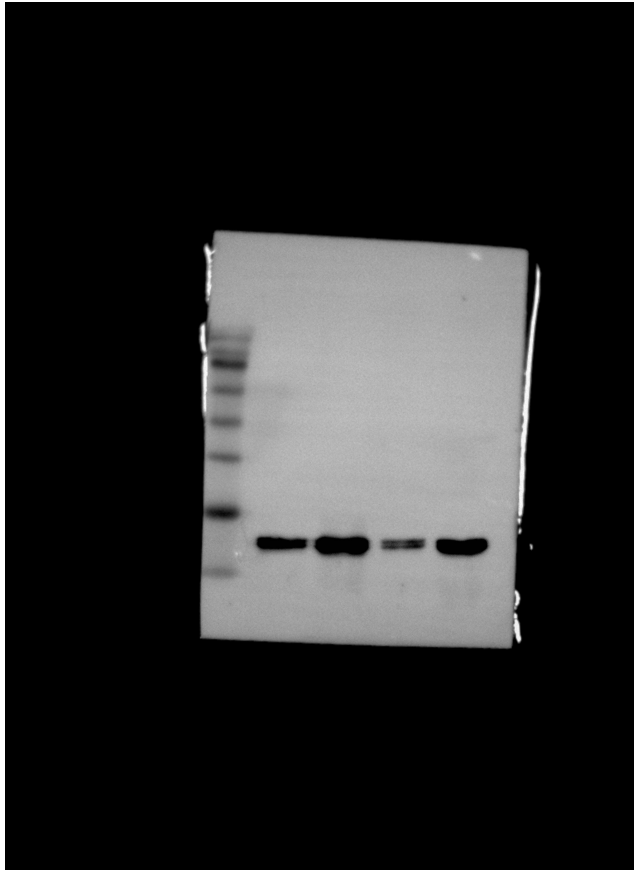

Fig 7 left

1. Twist: 21 kDa

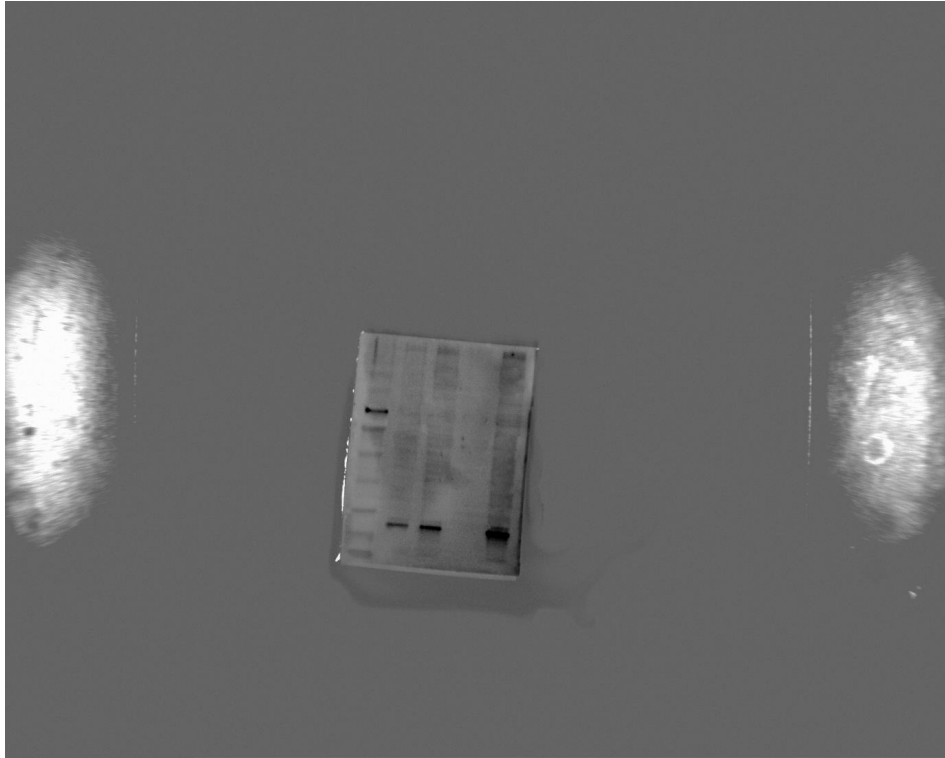

2.  $\beta$ -Catenin: 85 kDa

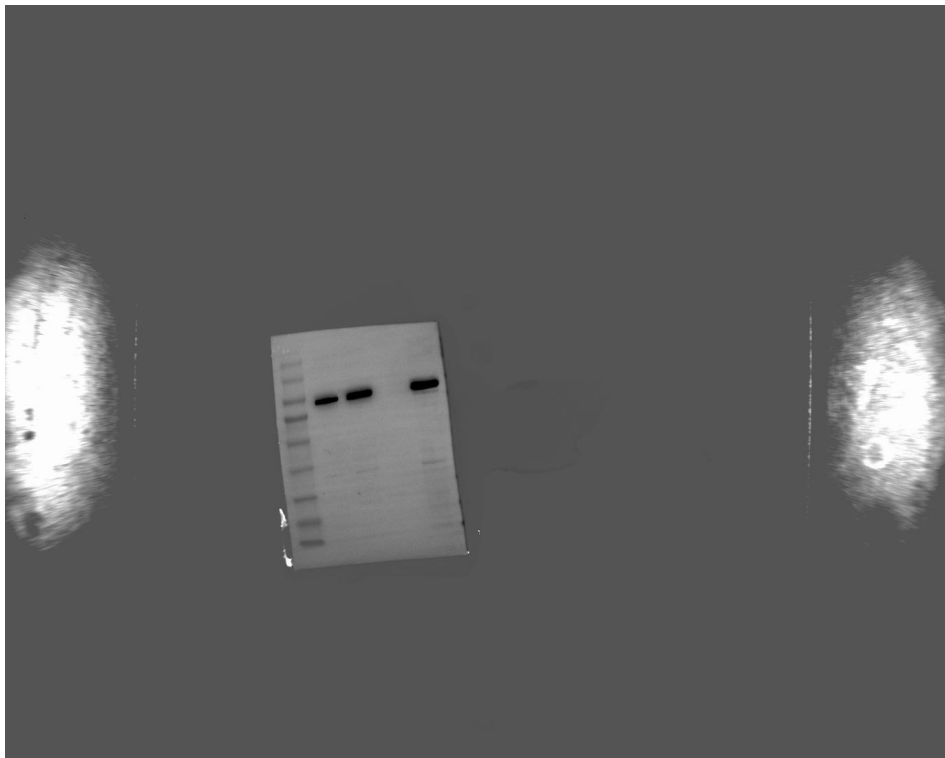

3. TCF4: 90 kDa

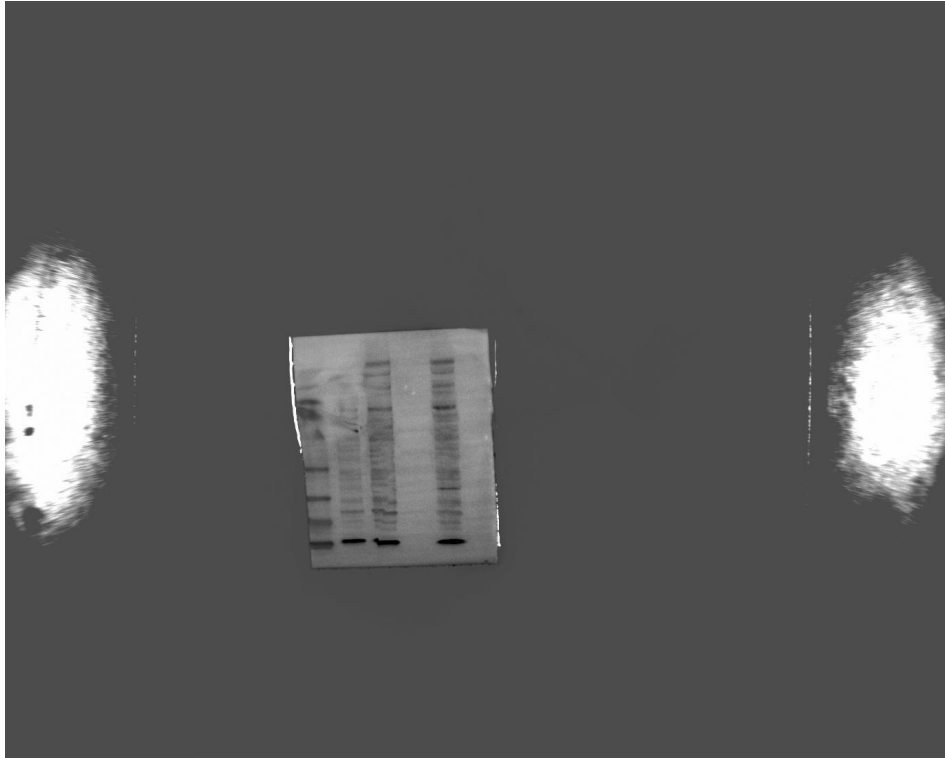

Fig 7 right

1. Twist: 21 kDa

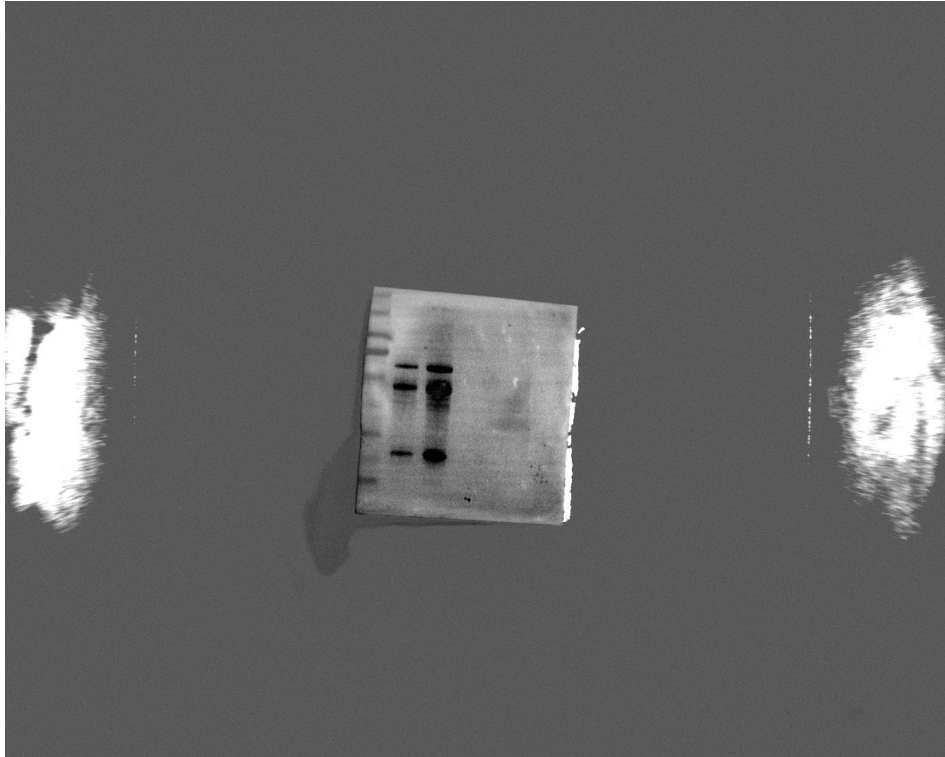

2.  $\beta$ -Catenin: 85 kDa

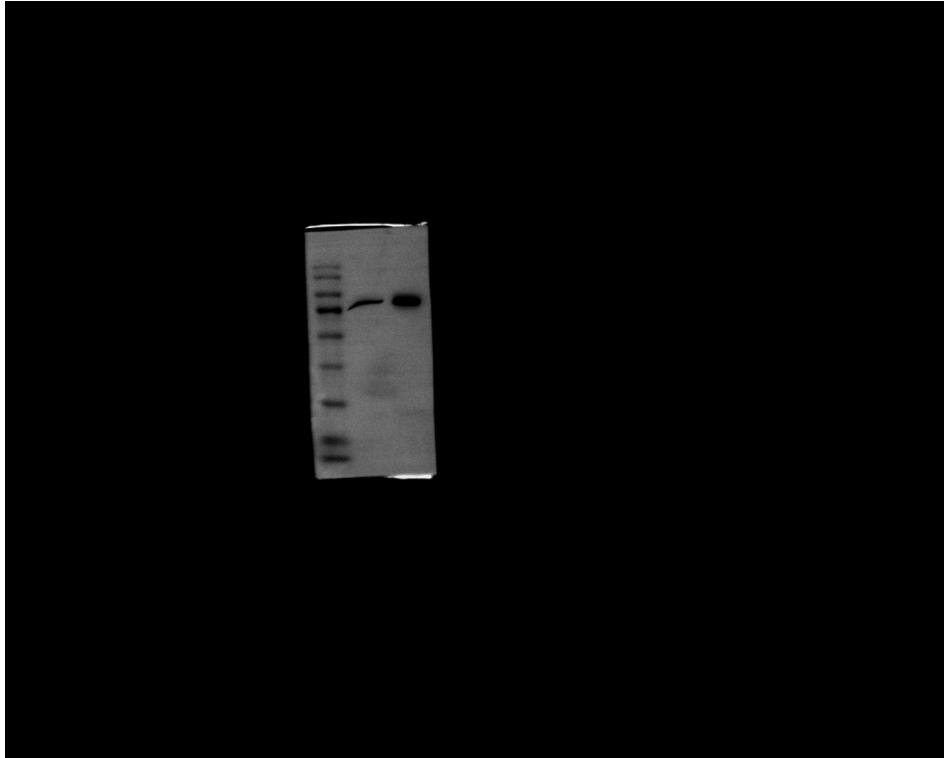

3.TCF4: 90 kDa

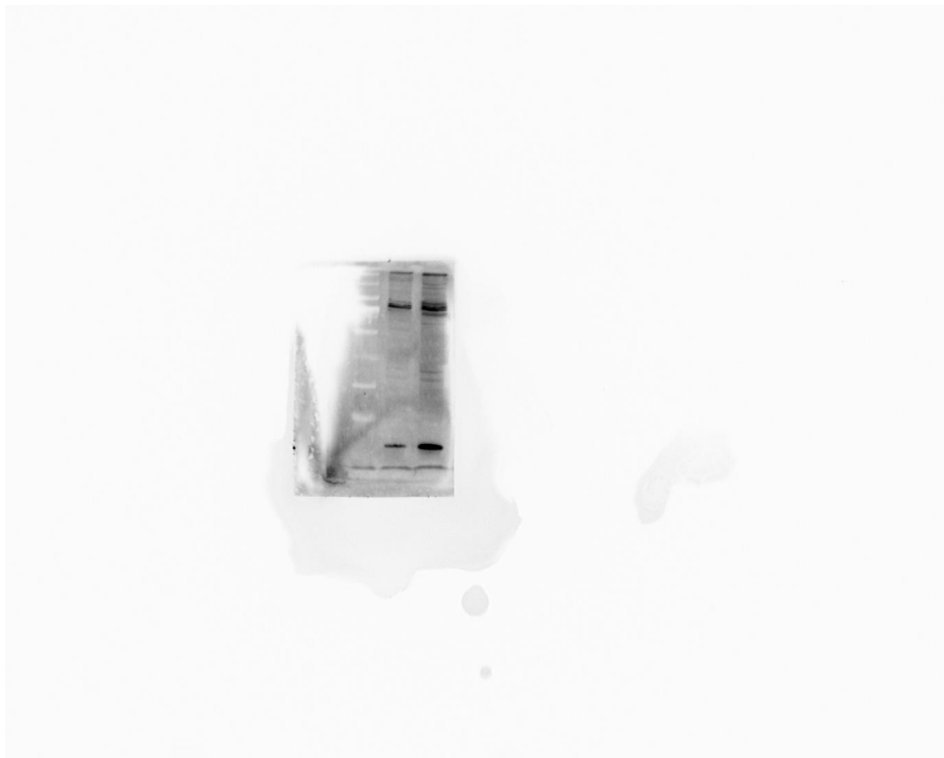

4. actin:42kDa

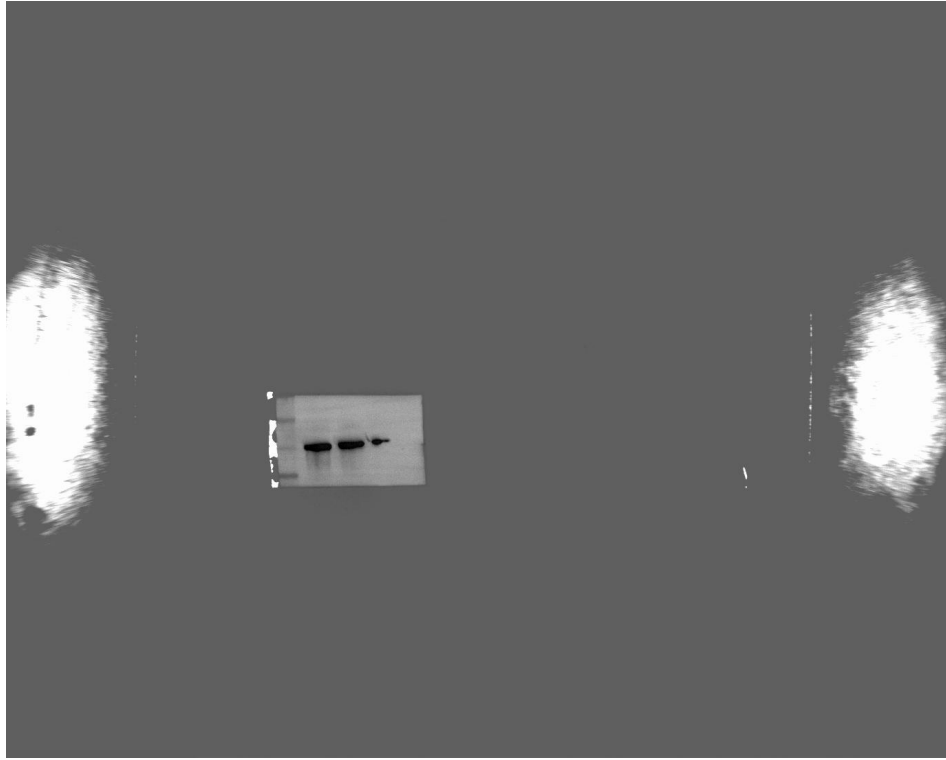

Supplement: MOESM1 [file 26702146]
